# Supplementary material
Source: PubMed Central journal article supplement (PMC3664332)
Supplement: supp_kws349_kws349_Web_Material.pdf [file supp_kws349_kws349_Web_Material.pdf]

**Web Figure 1.** Conditional probabilities of food consumption for all 64 food-items by dietary pattern class from latent class model, NBDPS 1997-2005.

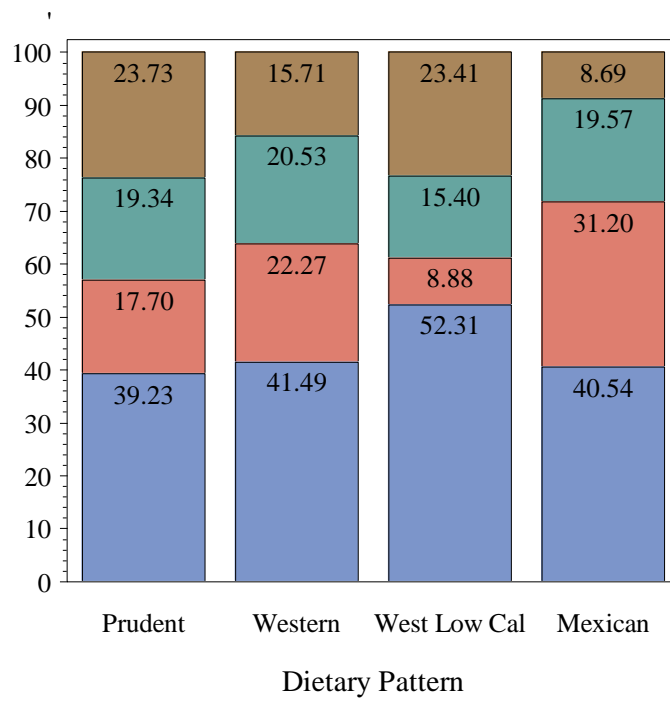

1 Butter    ■    Never    ■    1st tertile    ■    2nd tertile    ■    3rd tertile

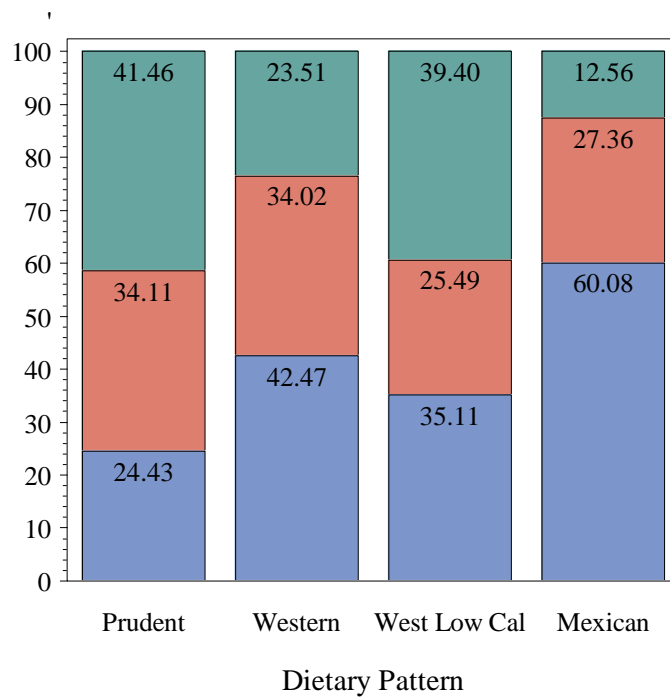

2 Cheese    ■    1st tertile    ■    2nd tertile    ■    3rd tertile

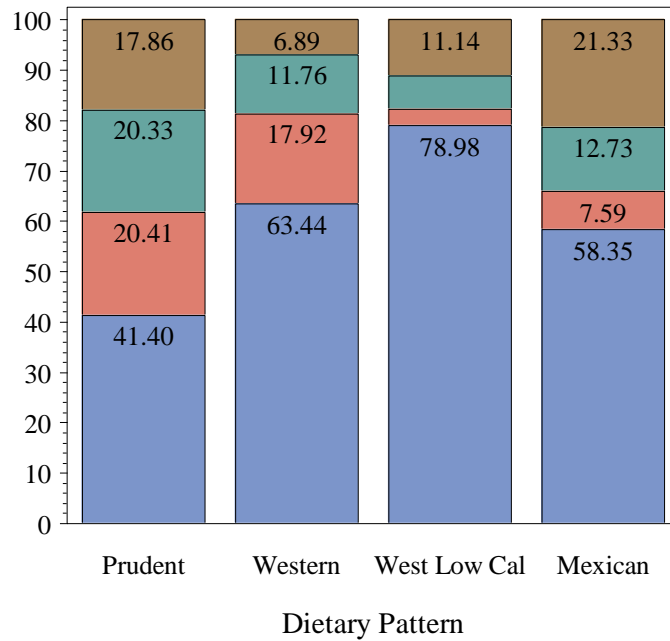

3 Cottage cheese

|                                                                                                                                  |                                                                                                                                  |
|----------------------------------------------------------------------------------------------------------------------------------|----------------------------------------------------------------------------------------------------------------------------------|
| <span style="display:inline-block; width:15px; height:15px; background-color:blue; border:1px solid black;"></span> Never        | <span style="display:inline-block; width:15px; height:15px; background-color:red; border:1px solid black;"></span> 1st tertile   |
| <span style="display:inline-block; width:15px; height:15px; background-color:green; border:1px solid black;"></span> 2nd tertile | <span style="display:inline-block; width:15px; height:15px; background-color:brown; border:1px solid black;"></span> 3rd tertile |

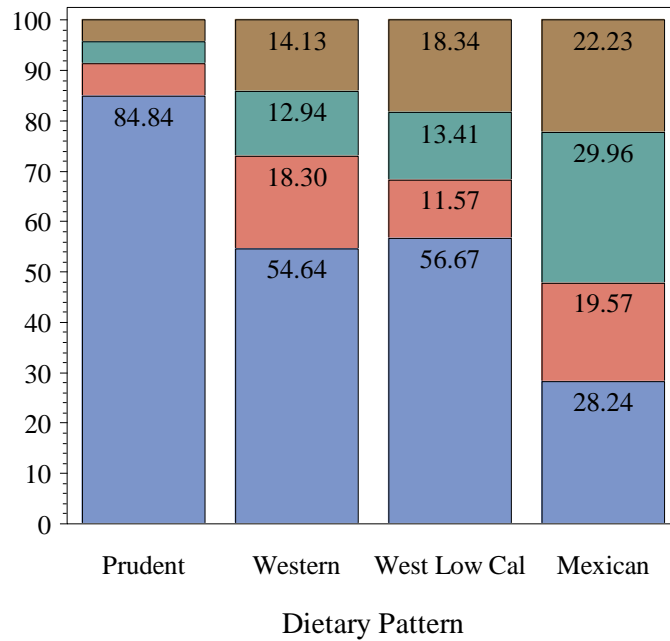

4 Whole Milk

|                                                                                                                                  |                                                                                                                                  |
|----------------------------------------------------------------------------------------------------------------------------------|----------------------------------------------------------------------------------------------------------------------------------|
| <span style="display:inline-block; width:15px; height:15px; background-color:blue; border:1px solid black;"></span> Never        | <span style="display:inline-block; width:15px; height:15px; background-color:red; border:1px solid black;"></span> 1st tertile   |
| <span style="display:inline-block; width:15px; height:15px; background-color:green; border:1px solid black;"></span> 2nd tertile | <span style="display:inline-block; width:15px; height:15px; background-color:brown; border:1px solid black;"></span> 3rd tertile |

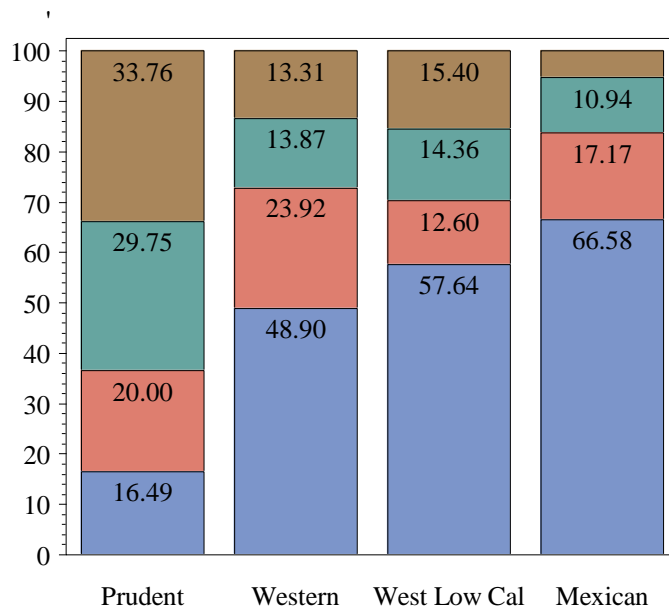

5 Reduced Fat Milk

Dietary Pattern

Never 1st tertile 2nd tertile 3rd tertile

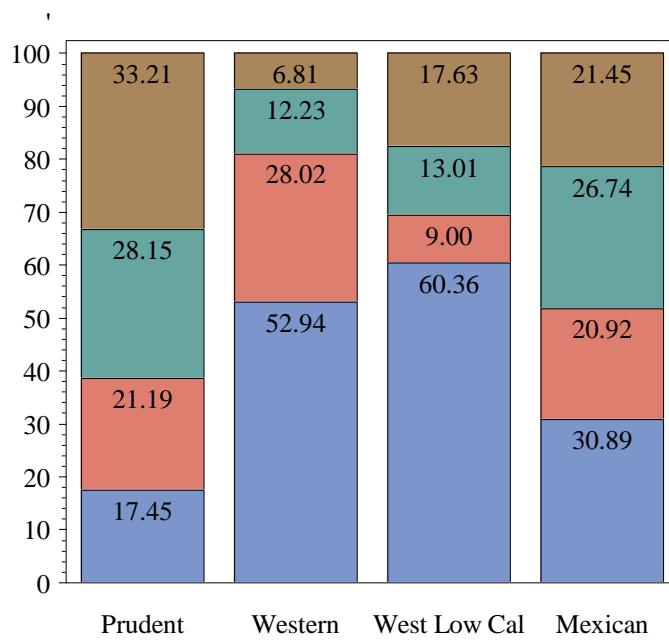

6 Yogurt

Dietary Pattern

Never 1st tertile 2nd tertile 3rd tertile

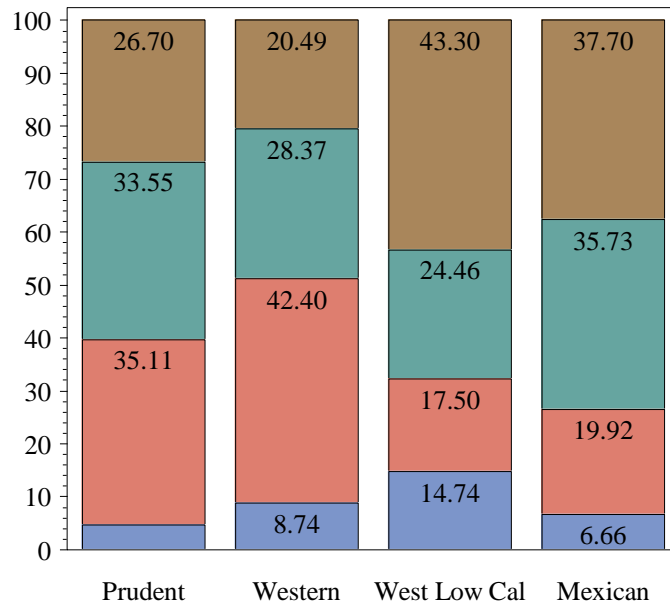

7 Eggs

Never 1st tertile 2nd tertile 3rd tertile

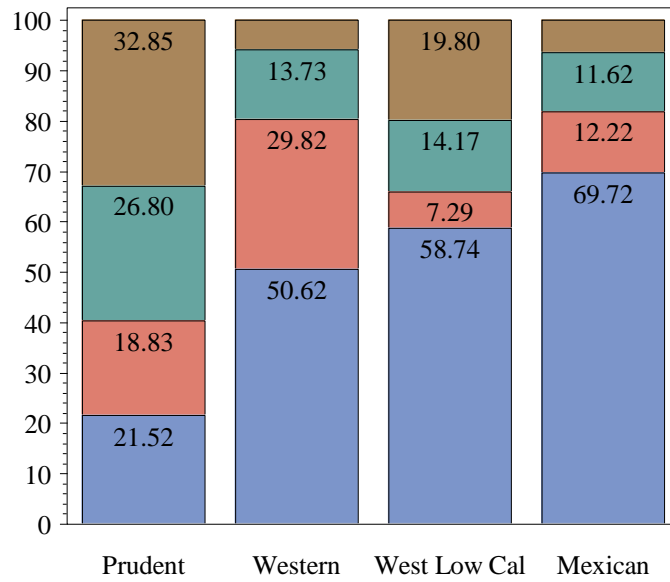

8 Salad Dressing

Never 1st tertile 2nd tertile 3rd tertile

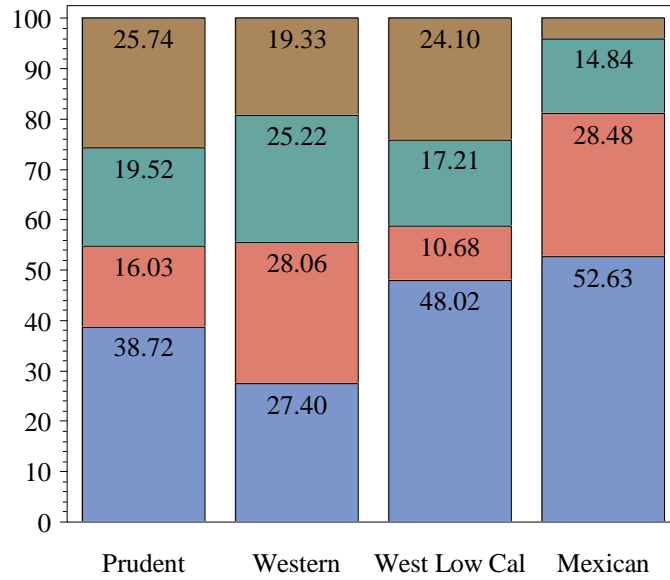

9 Margarine

Dietary Pattern

Never 1st tertile  
2nd tertile 3rd tertile

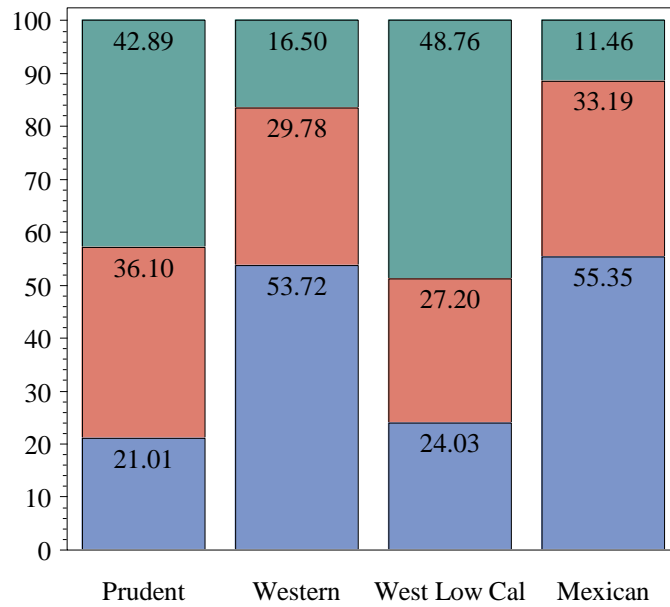

10 Chicken Broilers or Fryers

1st tertile 2nd tertile 3rd tertile

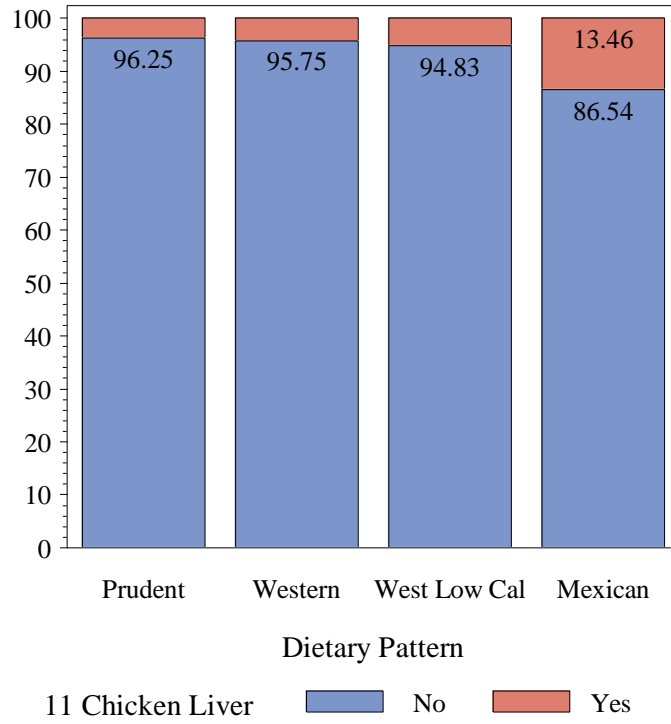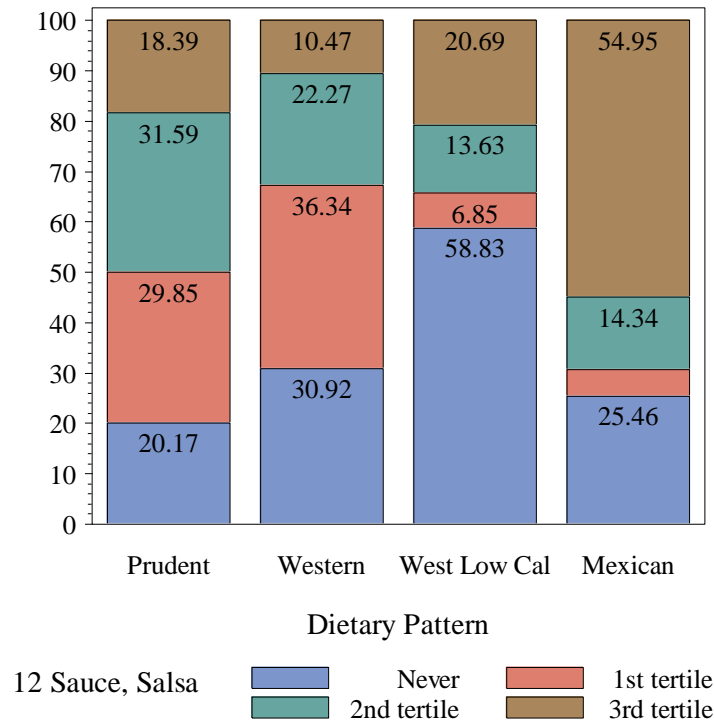

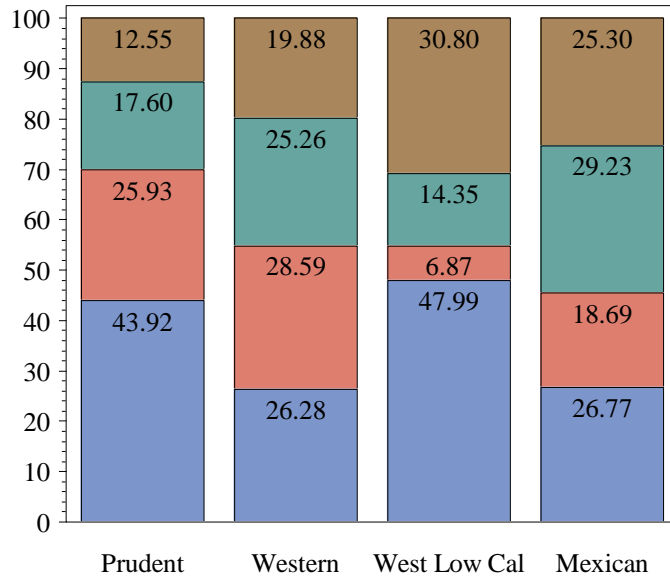

13 Bologna, Beef & Pork

Dietary Pattern

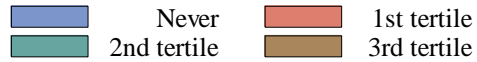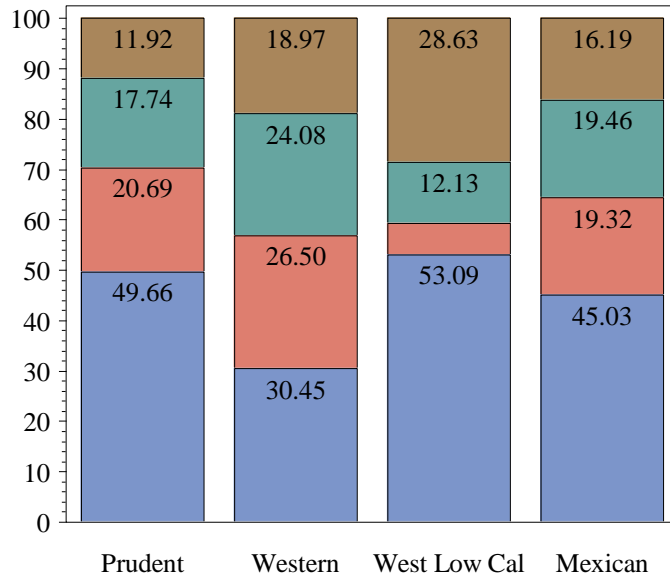

14 Frankfurter Beef

Dietary Pattern

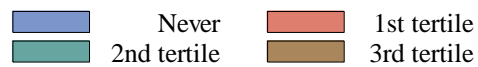

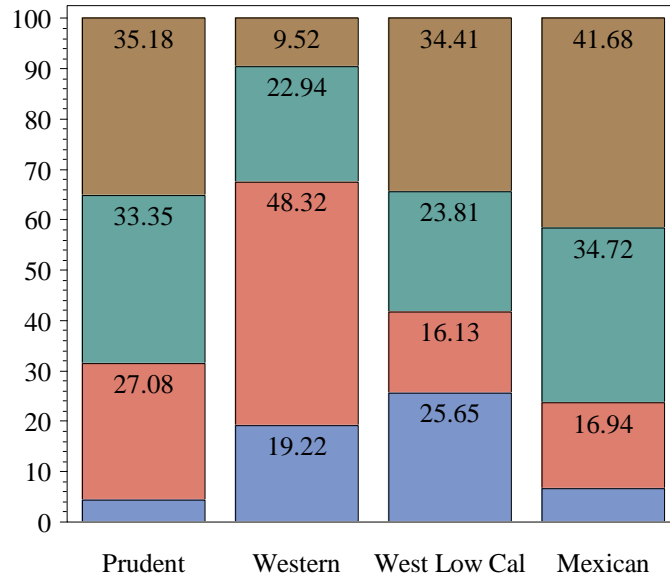

Dietary Pattern

15 Apples, raw

|  |             |  |             |
|--|-------------|--|-------------|
|  | Never       |  | 1st tertile |
|  | 2nd tertile |  | 3rd tertile |

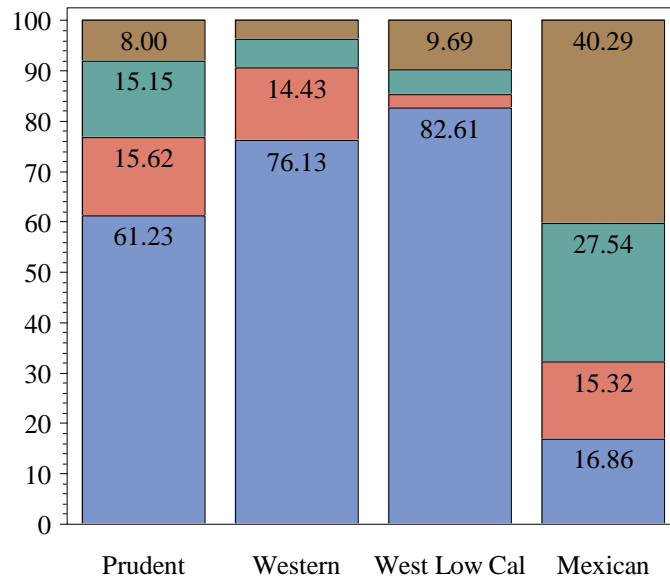

Dietary Pattern

16 Avocados, raw

|  |             |  |             |
|--|-------------|--|-------------|
|  | Never       |  | 1st tertile |
|  | 2nd tertile |  | 3rd tertile |



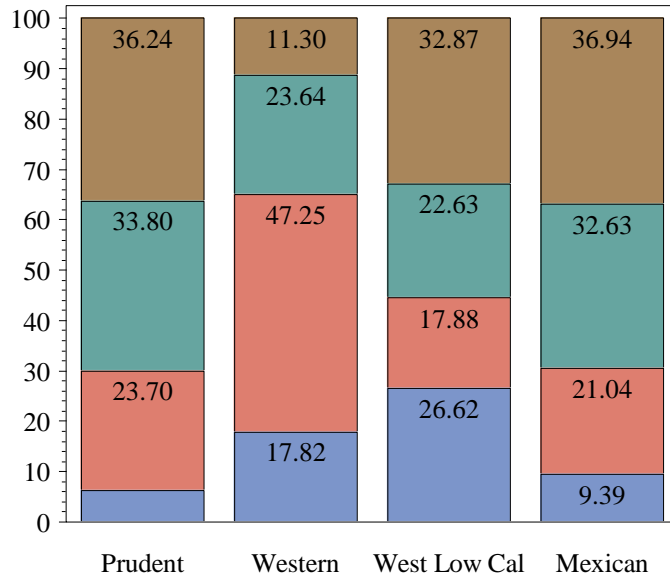

17 Bananas, raw

Never 1st tertile  
2nd tertile 3rd tertile

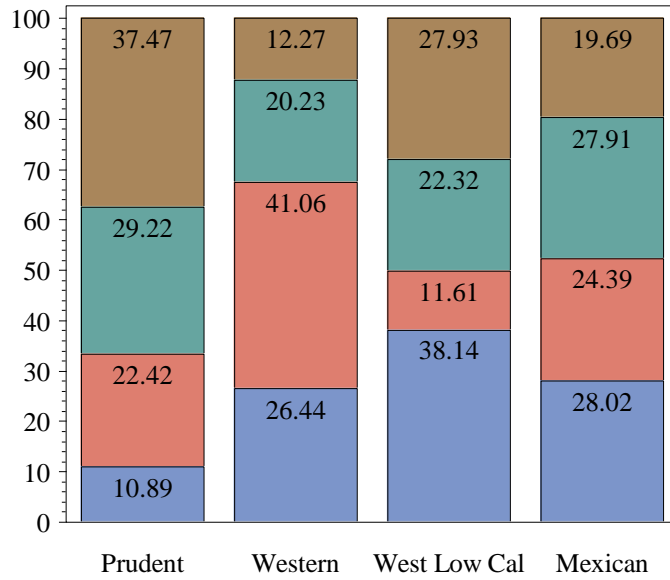

18 Fruit cocktail

Never 1st tertile  
2nd tertile 3rd tertile

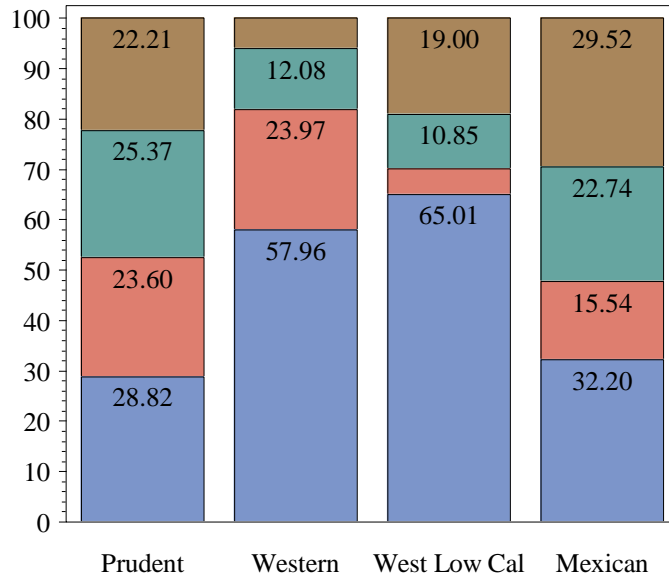

19 Melon, Cantaloupe, raw

Dietary Pattern

Never 1st tertile  
2nd tertile 3rd tertile

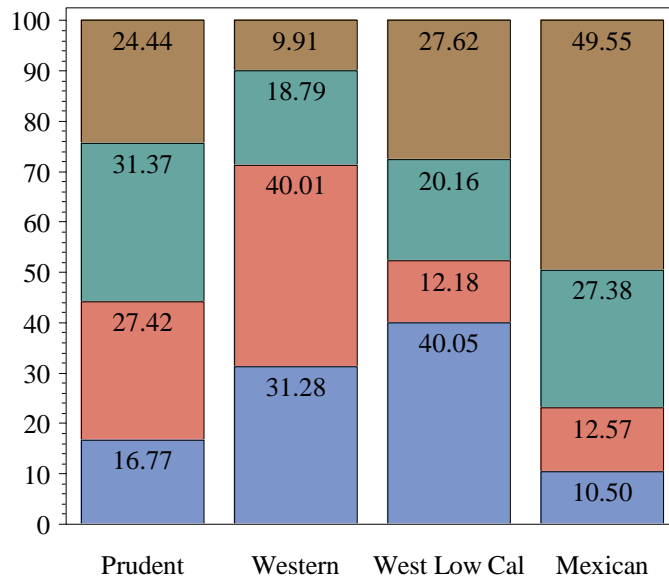

20 Oranges, raw

Dietary Pattern

Never 1st tertile  
2nd tertile 3rd tertile

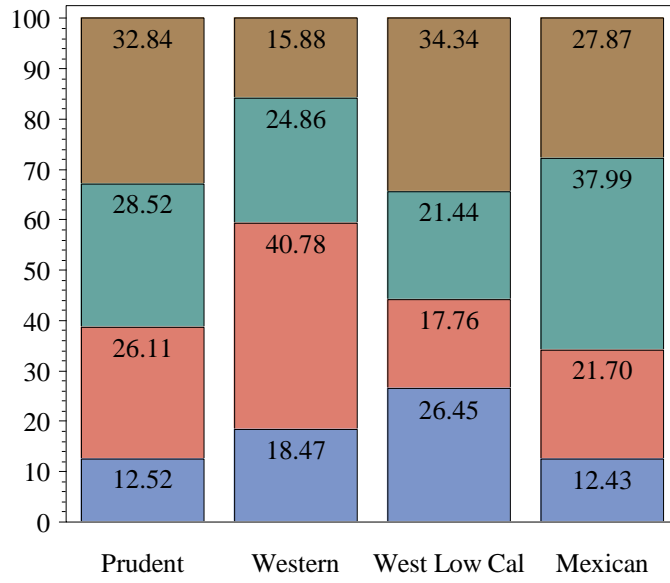

21 Orange juice

|                                                 |                                                  |
|-------------------------------------------------|--------------------------------------------------|
| <span style="color: blue;">■</span> Never       | <span style="color: red;">■</span> 1st tertile   |
| <span style="color: teal;">■</span> 2nd tertile | <span style="color: brown;">■</span> 3rd tertile |

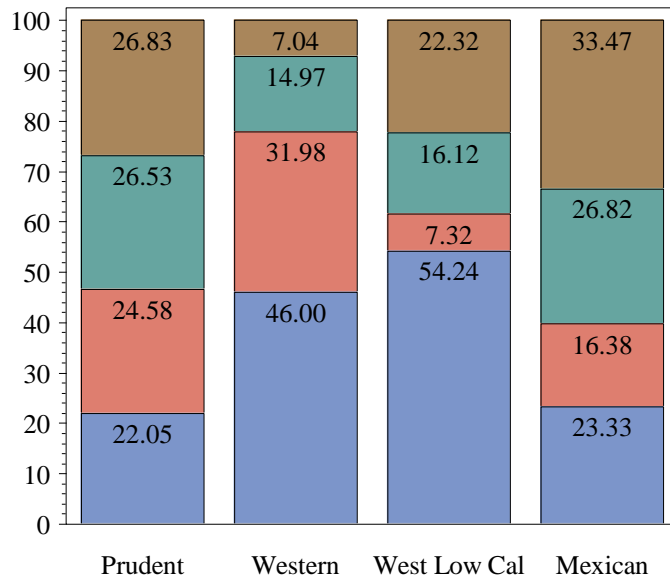

22 Peaches, raw

|                                                 |                                                  |
|-------------------------------------------------|--------------------------------------------------|
| <span style="color: blue;">■</span> Never       | <span style="color: red;">■</span> 1st tertile   |
| <span style="color: teal;">■</span> 2nd tertile | <span style="color: brown;">■</span> 3rd tertile |

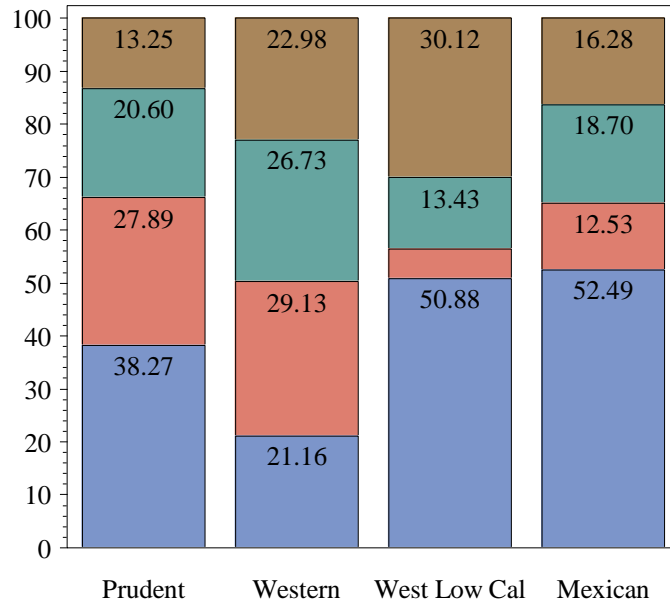

23 Pork

Legend: Never (blue), 1st tertile (red), 2nd tertile (teal), 3rd tertile (brown)

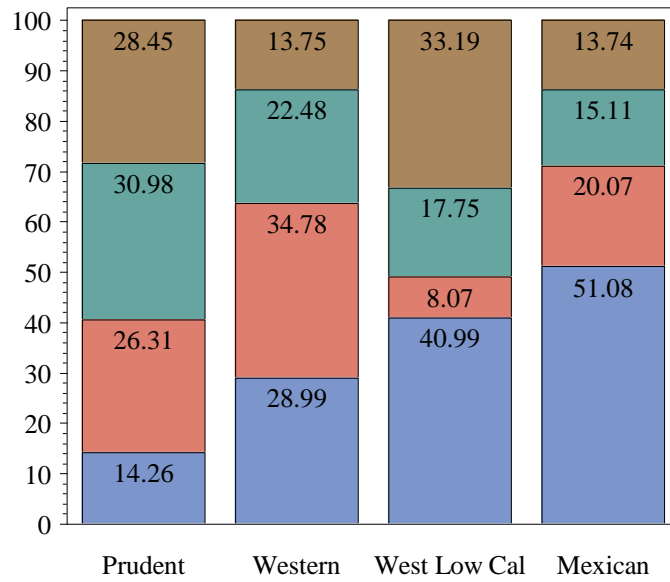

24 Green Beans

Legend: Never (blue), 1st tertile (red), 2nd tertile (teal), 3rd tertile (brown)

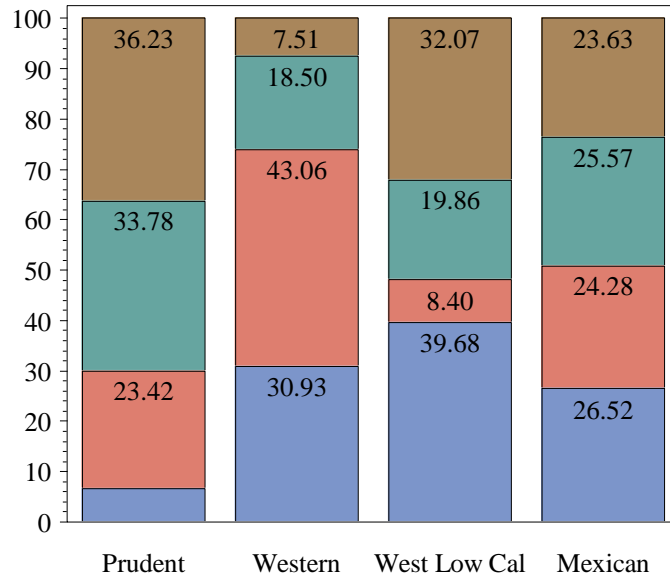

Dietary Pattern

25 Broccoli    Never    1st tertile  
 2nd tertile    3rd tertile

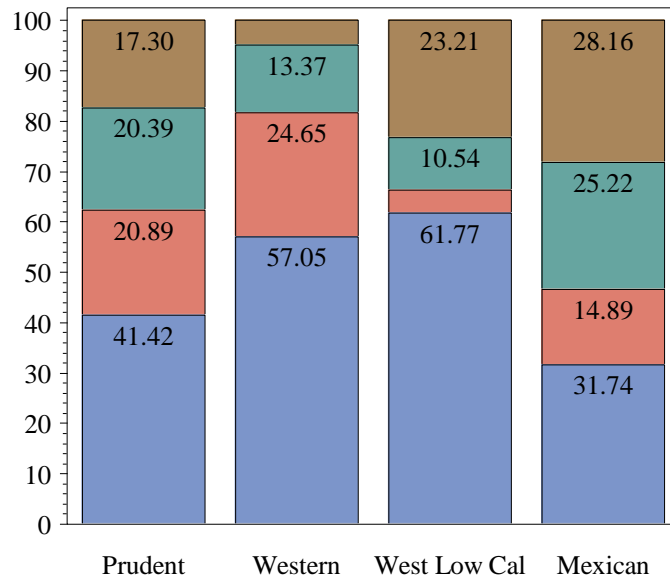

Dietary Pattern

26 Cabbage    Never    1st tertile  
 2nd tertile    3rd tertile

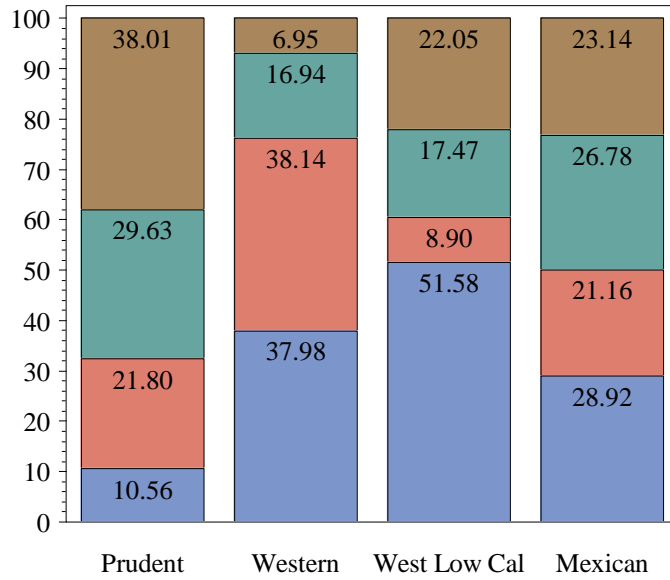

27 Carrots, raw

Dietary Pattern

Never 1st tertile  
2nd tertile 3rd tertile

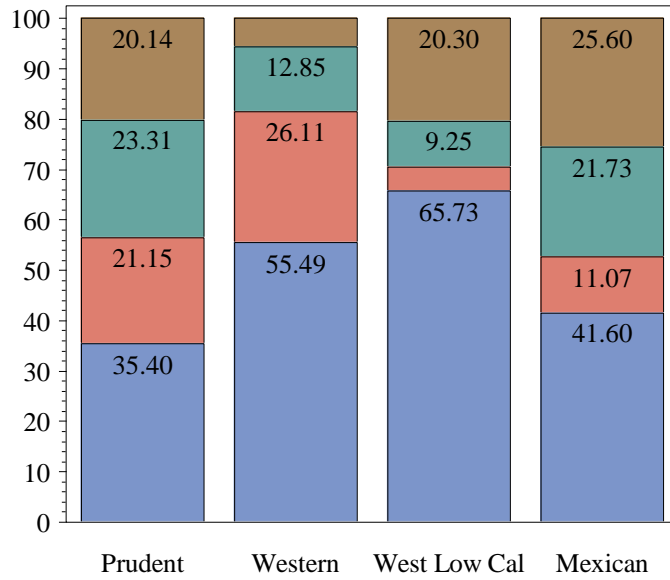

28 Carrots, cooked

Dietary Pattern

Never 1st tertile  
2nd tertile 3rd tertile

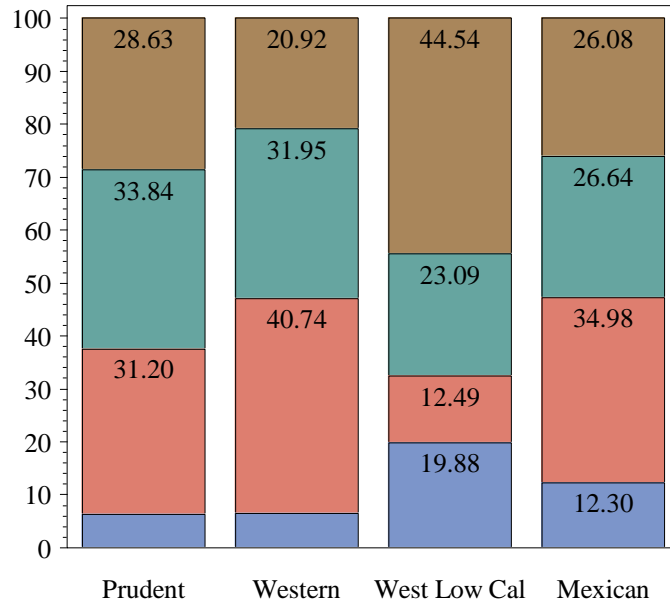

Dietary Pattern

29 Corn    Never    1st tertile    2nd tertile    3rd tertile

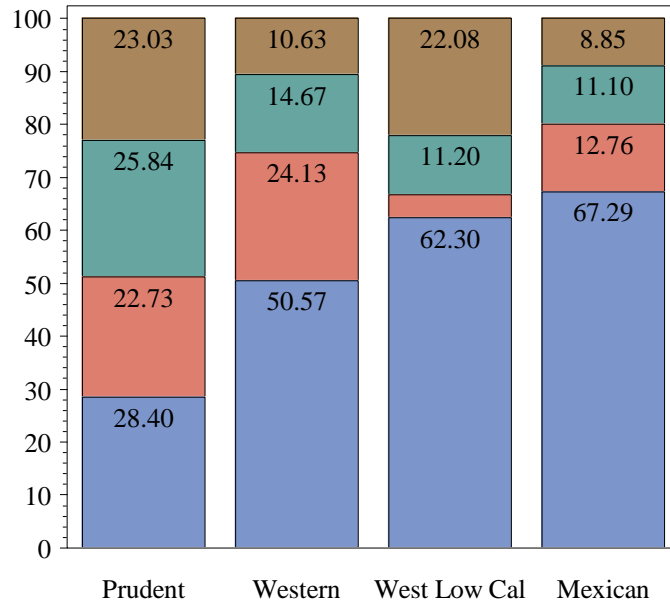

Dietary Pattern

30 Peas    Never    1st tertile    2nd tertile    3rd tertile

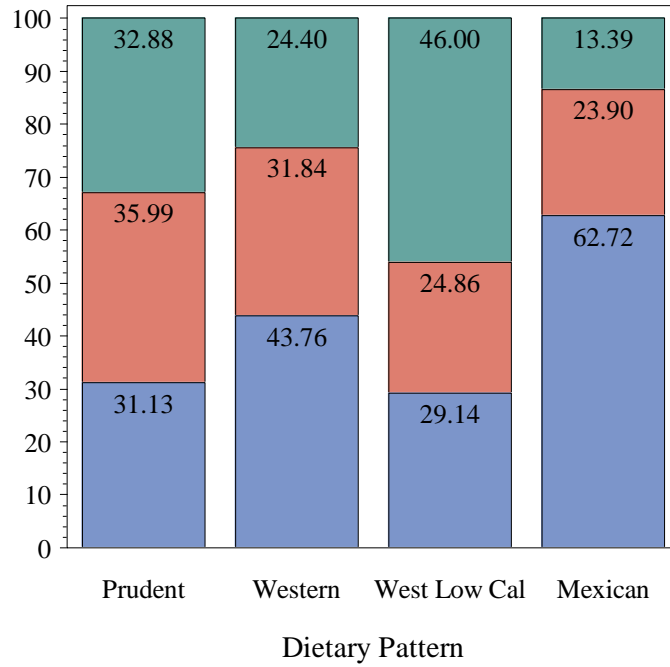

31 Potatoes with out salt    1st tertile    2nd tertile    3rd tertile

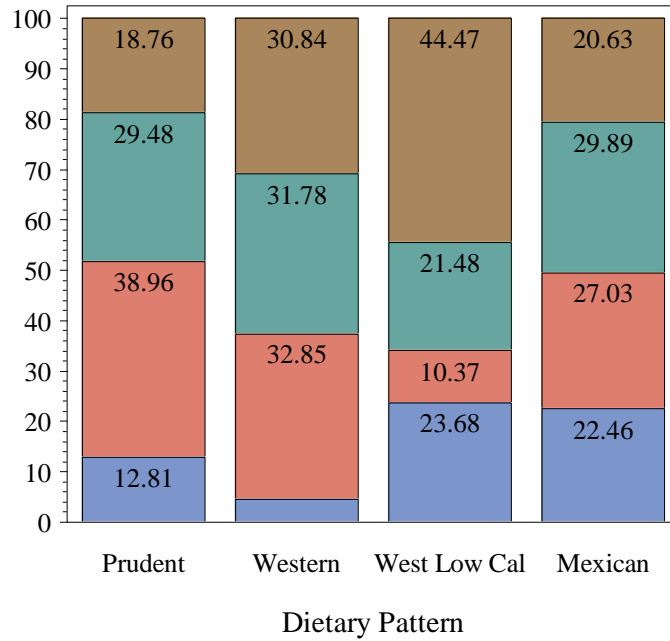

32 French fries (potatoes salt added)    Never    1st tertile    2nd tertile    3rd tertile



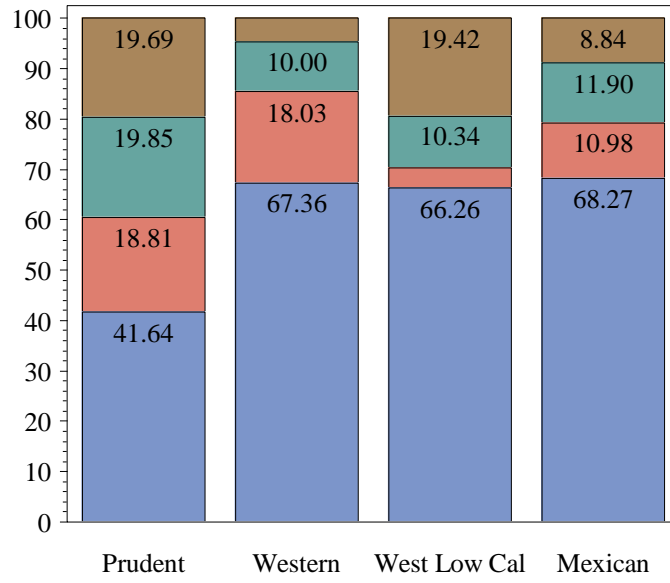

33 Spinach

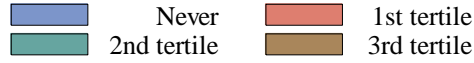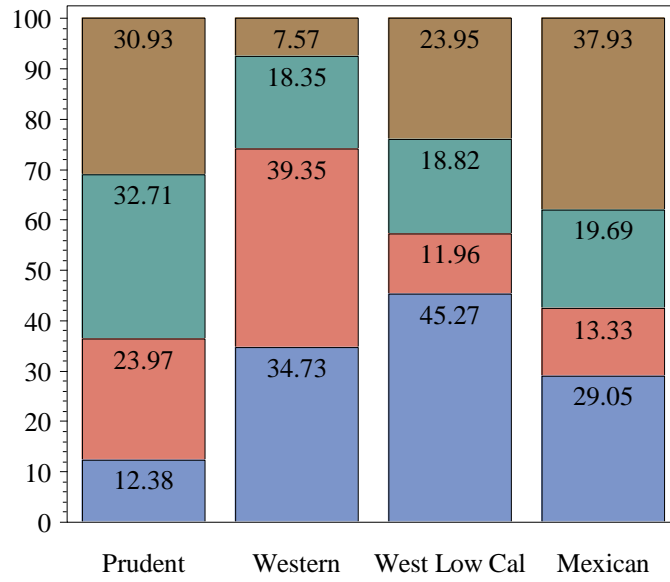

34 Tomatoes

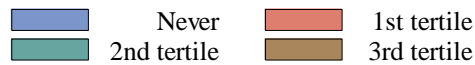

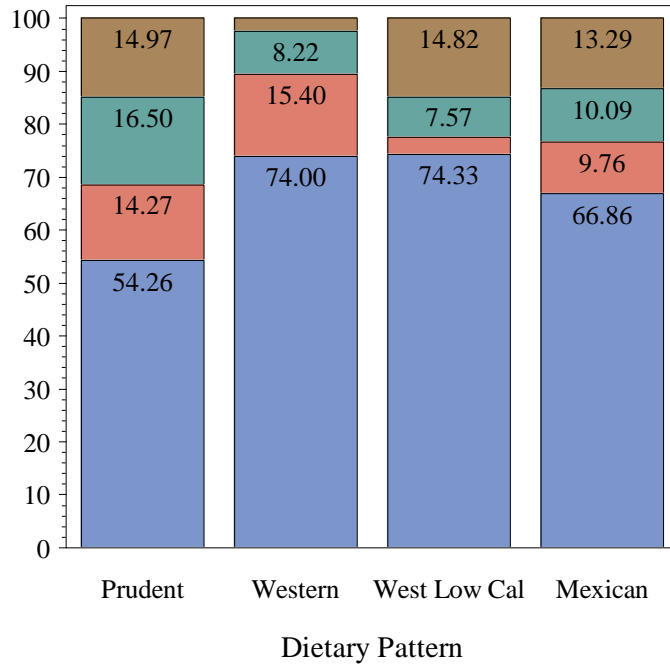

35 Yam    Never    1st tertile    2nd tertile    3rd tertile

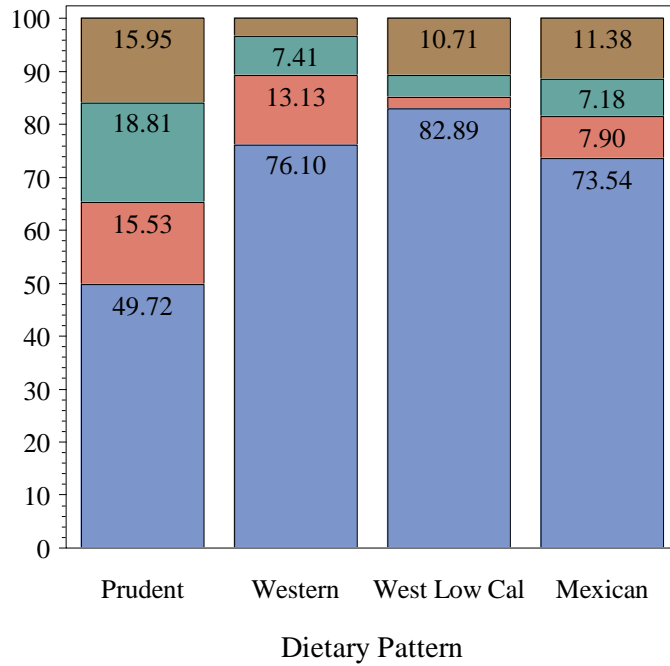

36 Squash    Never    1st tertile    2nd tertile    3rd tertile

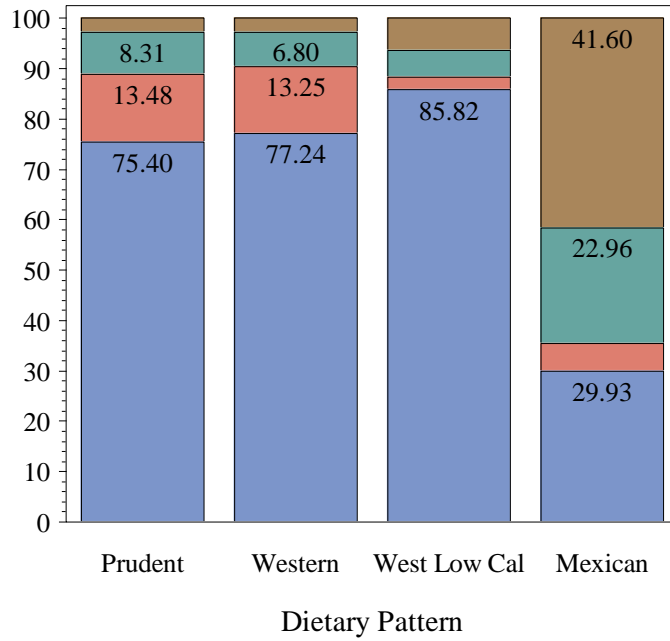

37 Chile Peppers

■ Never      ■ 1st tertile  
■ 2nd tertile      ■ 3rd tertile

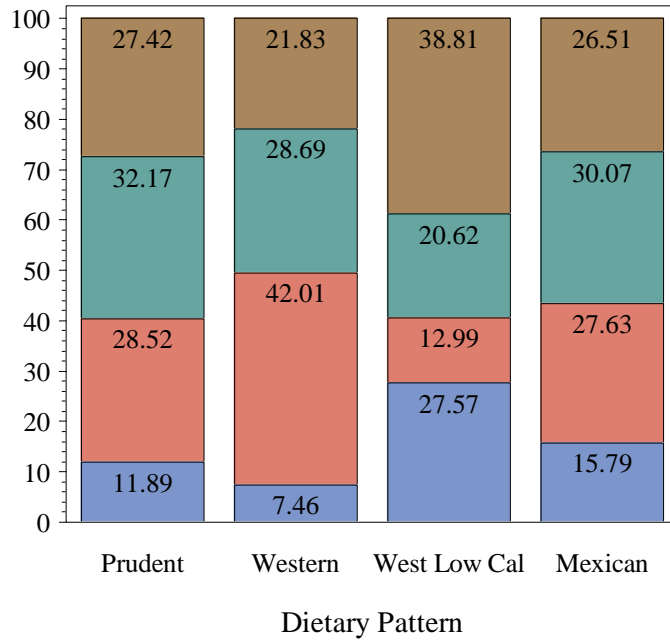

38 Beef, comp or rti cuts, 1/4fat

■ Never      ■ 1st tertile  
■ 2nd tertile      ■ 3rd tertile

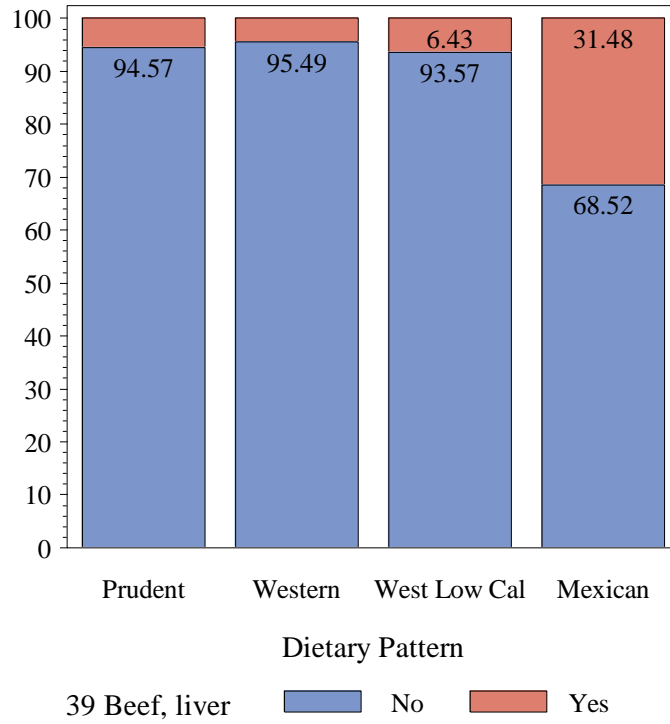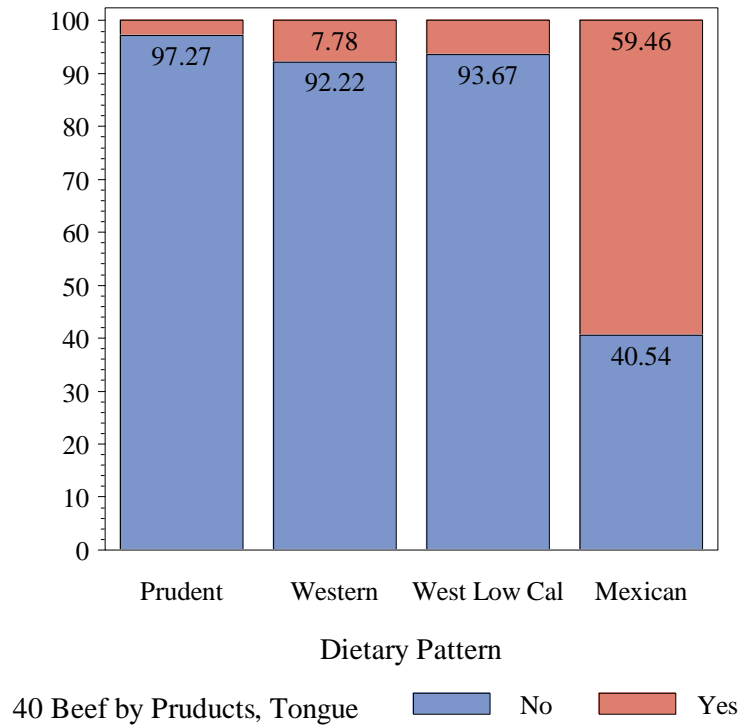

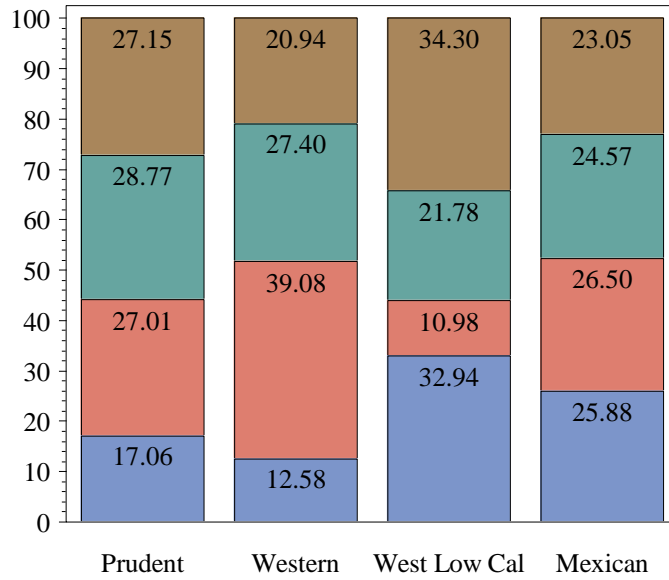

Dietary Pattern

41 Beef, Top Sirloin, 0 fat

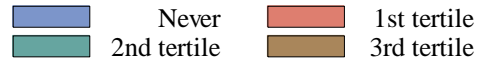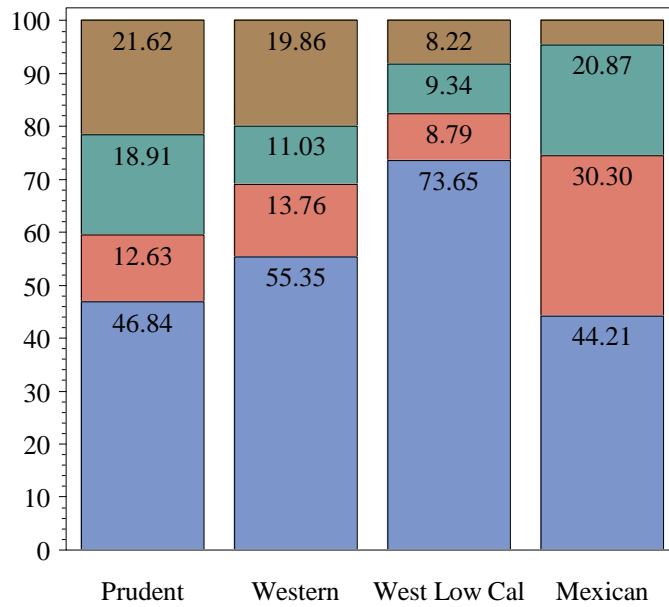

Dietary Pattern

42 Coffee

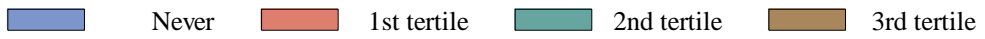

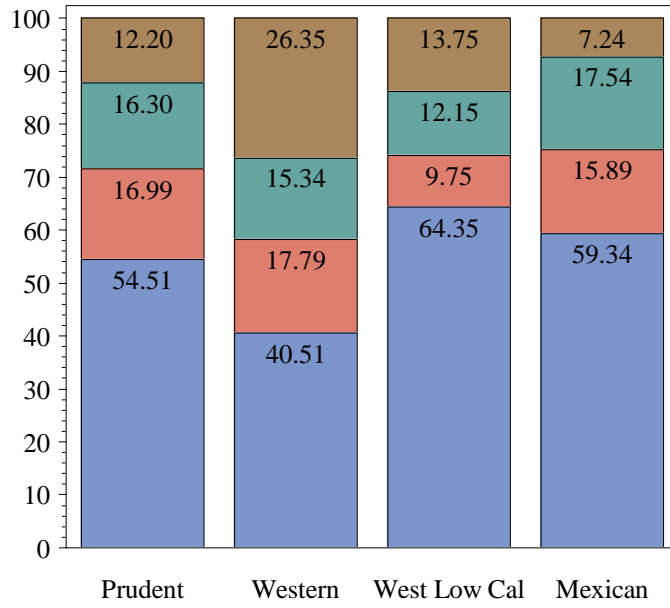

43 Tea ■ Never ■ 1st tertile ■ 2nd tertile ■ 3rd tertile

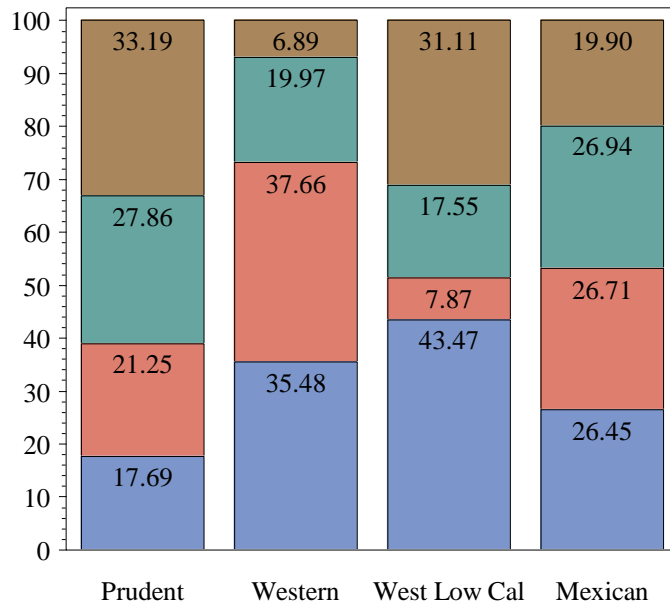

44 Fish ■ Never ■ 1st tertile ■ 2nd tertile ■ 3rd tertile

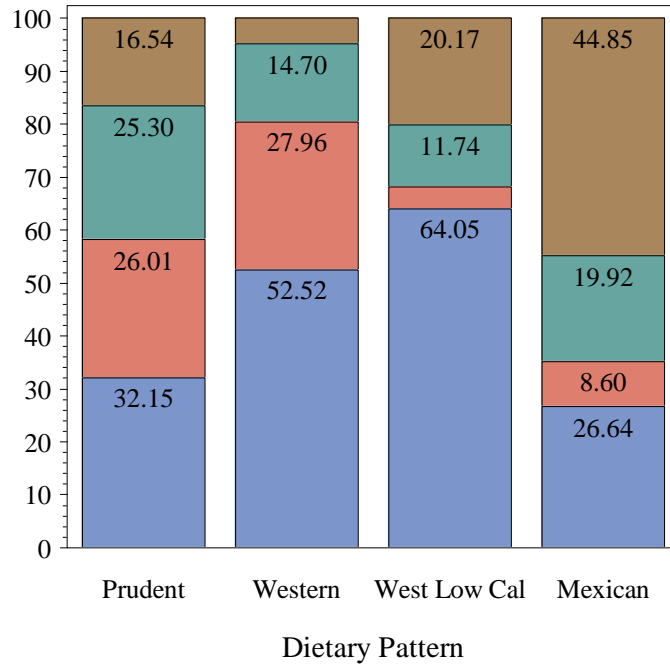

45 Beans    Never    1st tertile    2nd tertile    3rd tertile

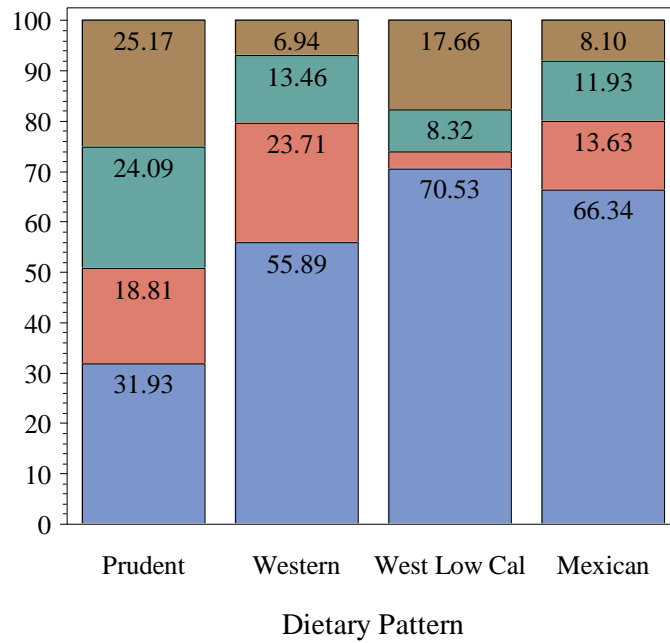

46 Peanuts    Never    1st tertile    2nd tertile    3rd tertile

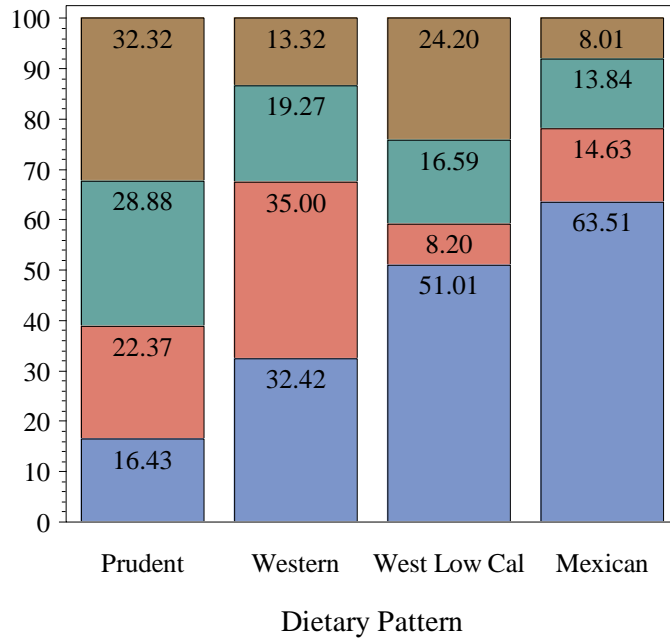

47 Peanut Butter

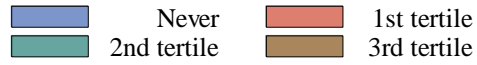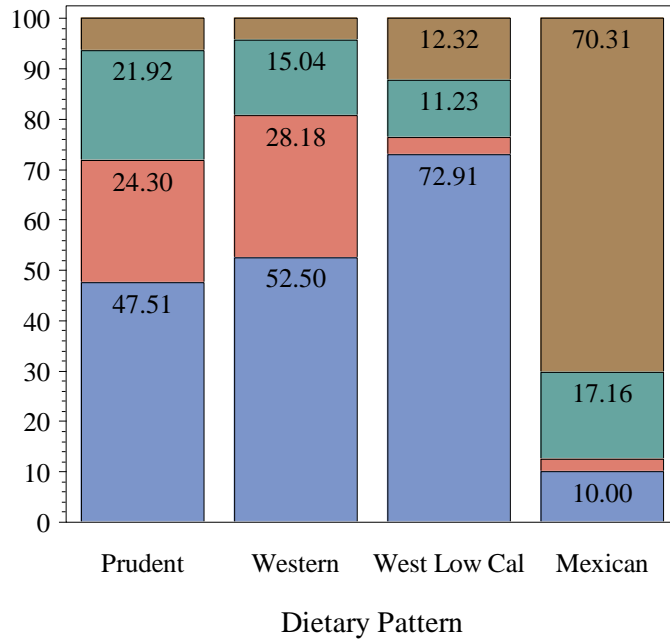

48 Refried Beans

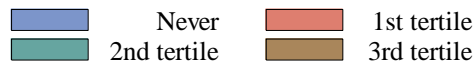



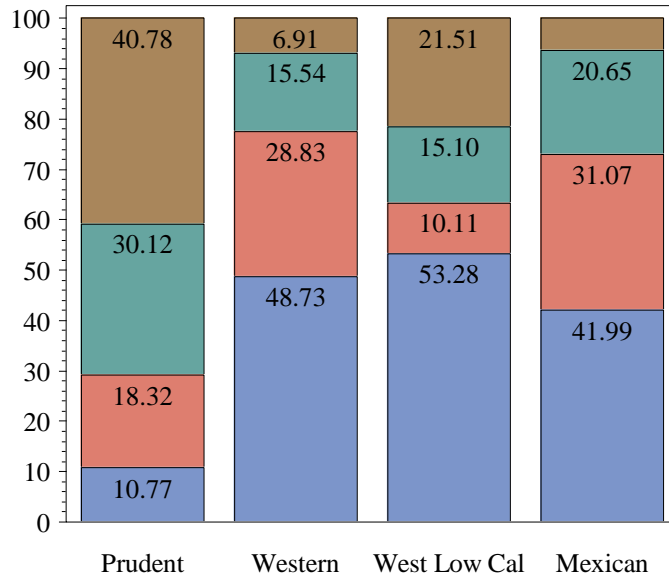

49 Whole Wheat Bread

Dietary Pattern

Never 1st tertile  
2nd tertile 3rd tertile

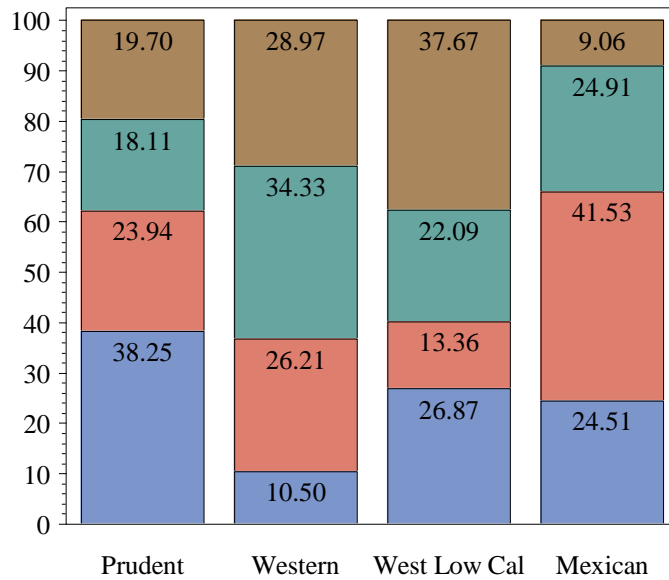

50 White bread

Dietary Pattern

Never 1st tertile  
2nd tertile 3rd tertile

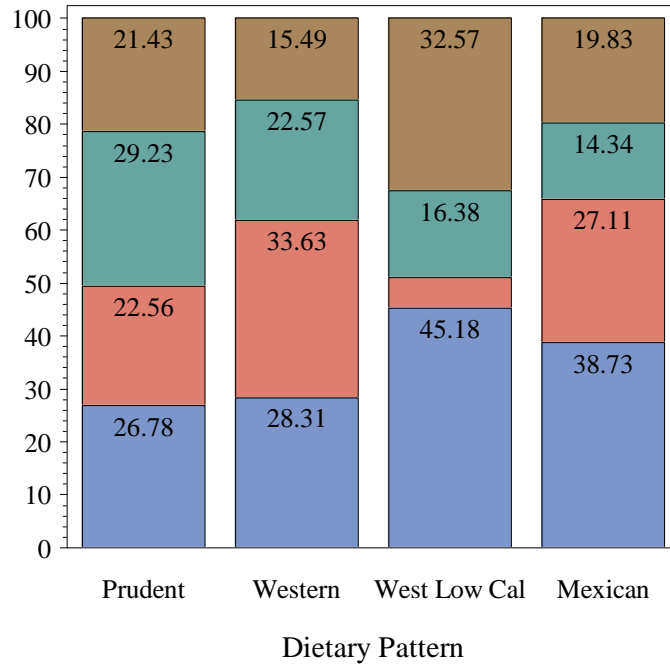

51 Cake    Never    1st tertile    2nd tertile    3rd tertile

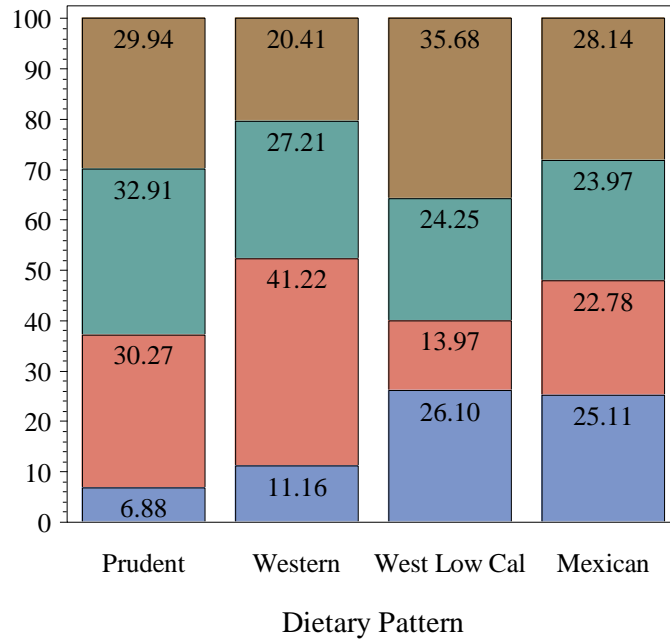

52 Cookies    Never    1st tertile    2nd tertile    3rd tertile

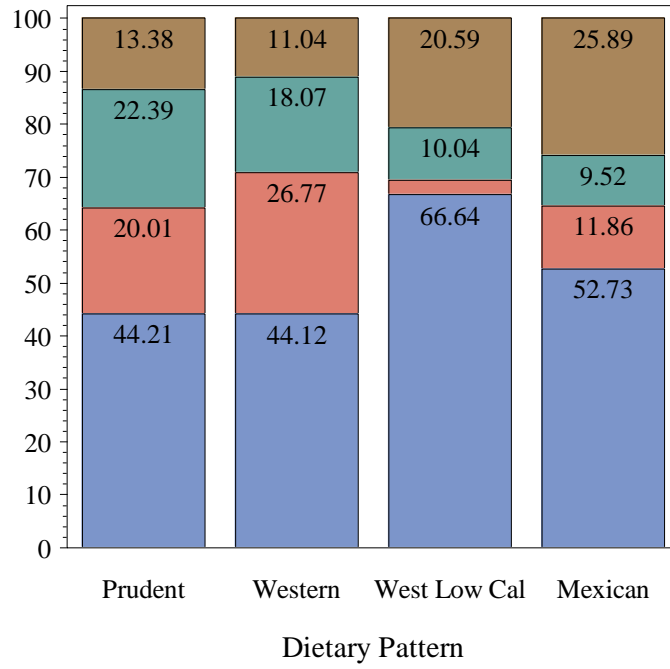

53 Pie      Never      1st tertile      2nd tertile      3rd tertile

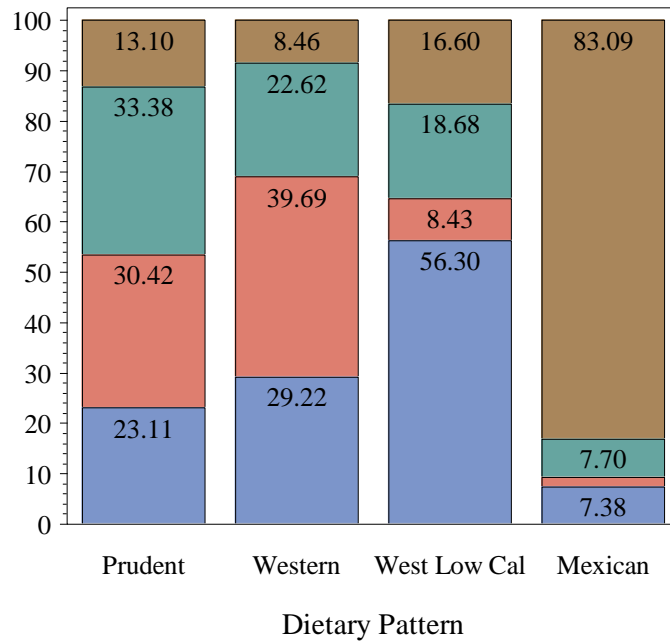

54 Tortillas      Never      1st tertile      2nd tertile      3rd tertile

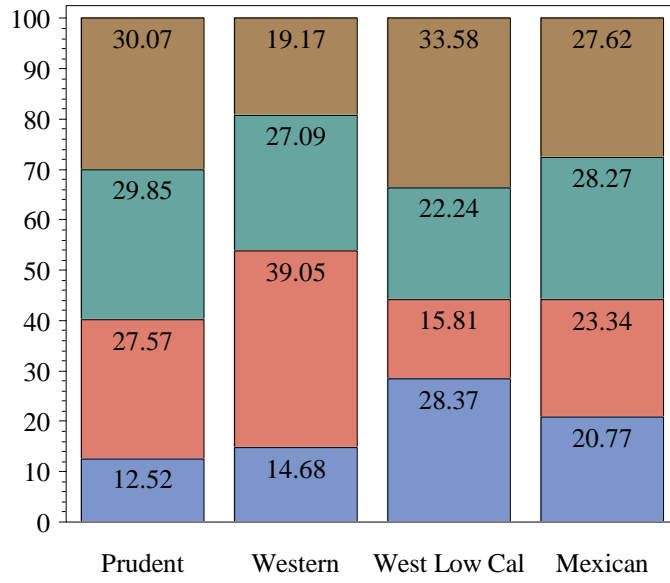

Dietary Pattern

55 Ice Cream

|                                                 |                                                  |
|-------------------------------------------------|--------------------------------------------------|
| <span style="color: blue;">■</span> Never       | <span style="color: red;">■</span> 1st tertile   |
| <span style="color: teal;">■</span> 2nd tertile | <span style="color: brown;">■</span> 3rd tertile |

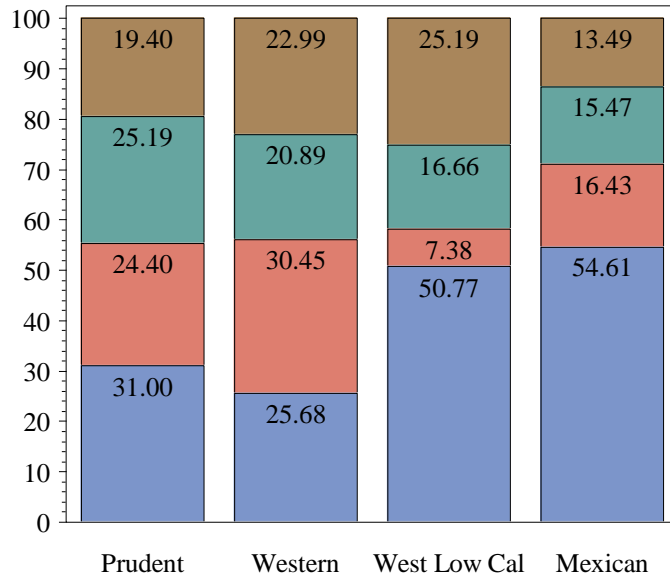

Dietary Pattern

56 Candies, Hard

|                                                 |                                                  |
|-------------------------------------------------|--------------------------------------------------|
| <span style="color: blue;">■</span> Never       | <span style="color: red;">■</span> 1st tertile   |
| <span style="color: teal;">■</span> 2nd tertile | <span style="color: brown;">■</span> 3rd tertile |



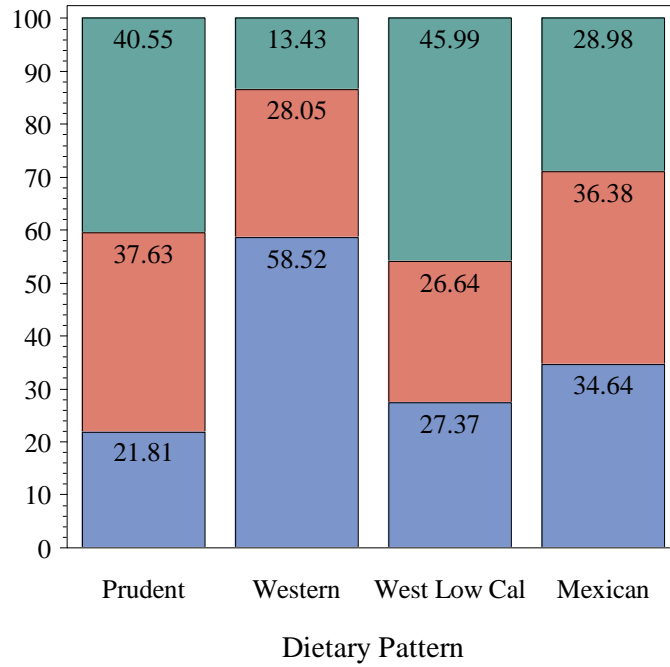

59 Spaguetti      1st tertile      2nd tertile      3rd tertile

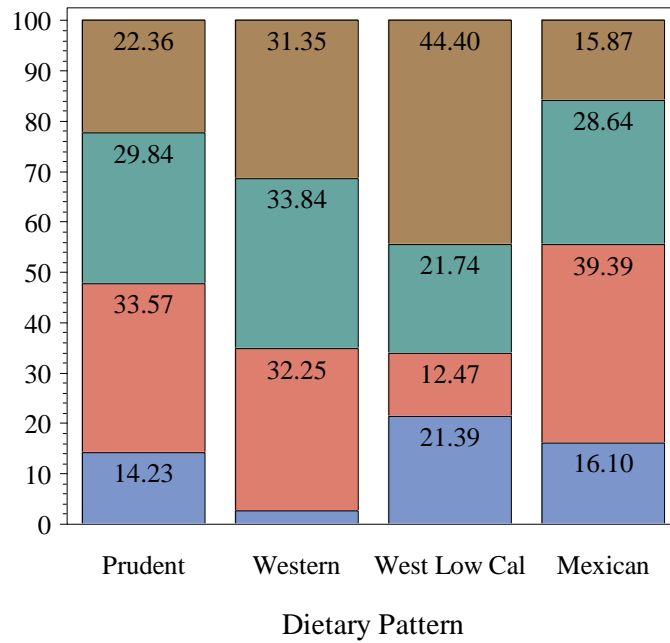

60 Beef ground, 75% In meat      Never      1st tertile      2nd tertile      3rd tertile

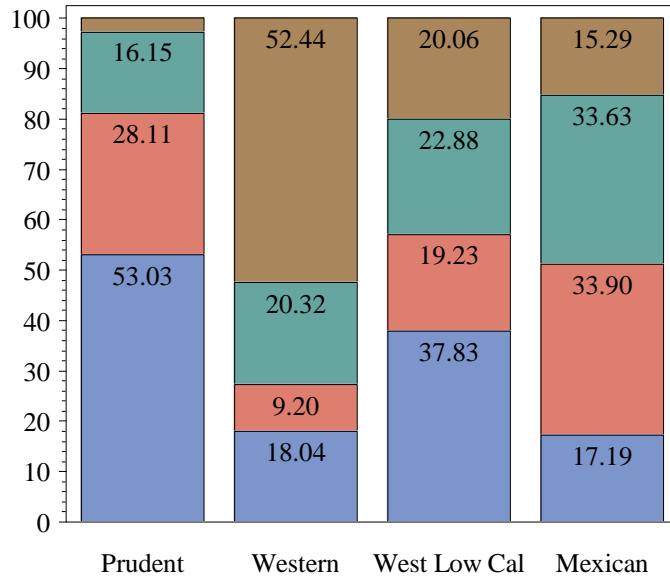

61 Regular Soda

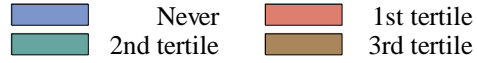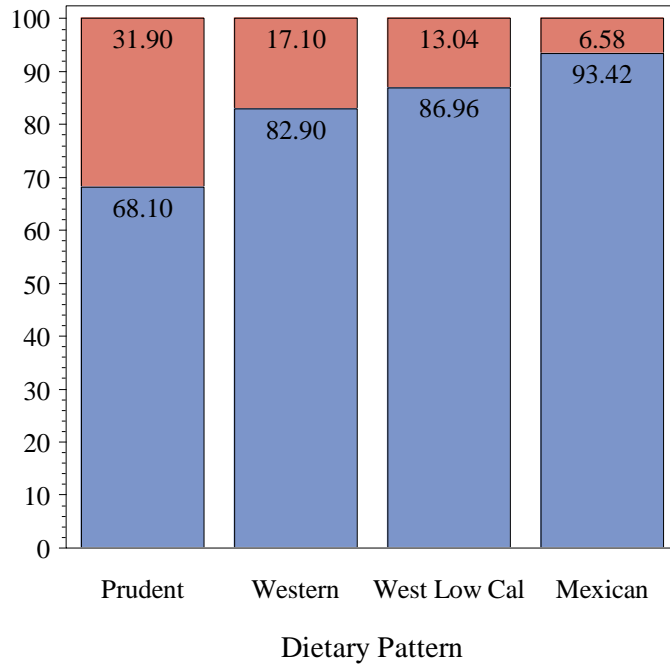

62 Low Calories Soda

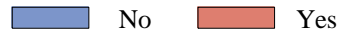

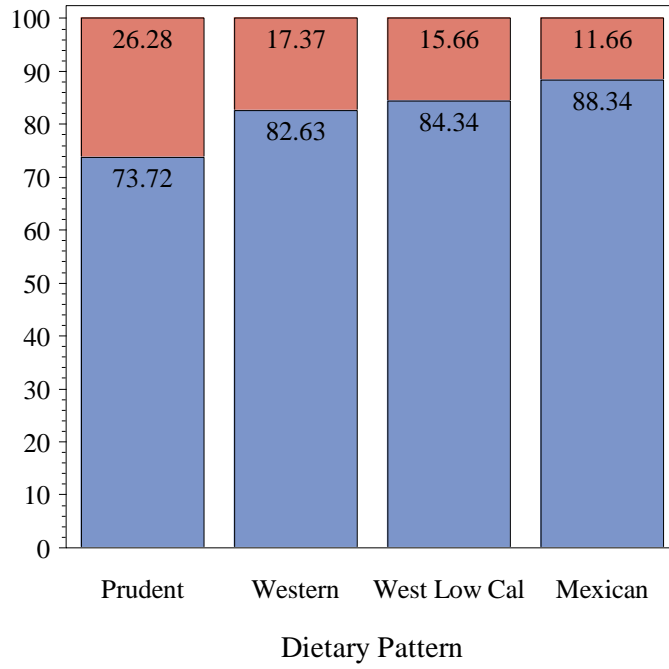

63 Cereal Fortified w 100% Folic Acid

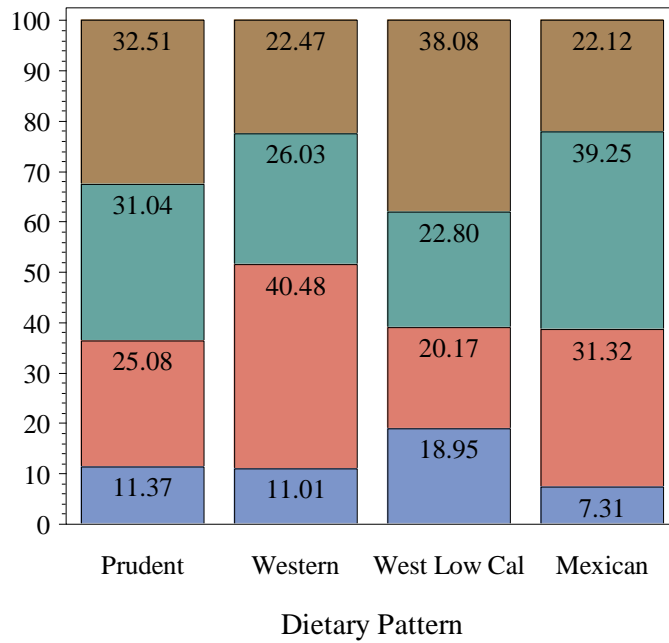

64 Cereal not Highly Fortified
